# Supplementary material
Source: PubMed Central journal article supplement (PMC1052022)
Supplement: JCI0524569sd.pdf [file JCI0524569sd.pdf]

- S1. Yang, W., et al. 2003. MX1013, a dipeptide caspase inhibitor with potent in vivo antiapoptotic activity. *Br. J. Pharmacol.* **140**:402–412.
- S2. Moretti, A., et al. 2002. Essential myosin light chain as a target for caspase-3 in failing myocardium. *Proc. Natl. Acad. Sci. U. S. A.* **99**:11860–11865.
- S3. Communal, C., et al. 2002. Functional consequences of caspase activation in cardiac myocytes. *Proc. Natl. Acad. Sci. U. S. A.* **99**:6252–6256.
- S4. Chang, J., et al. 2003. Inhibitory cardiac transcription factor, SRF-N, is generated by caspase 3 cleavage in human heart failure and attenuated by ventricular unloading. *Circulation.* **108**:407–413.
- S5. Bialik, S., et al. 1999. The mitochondrial apoptotic pathway is activated by serum and glucose deprivation in cardiac myocytes. *Circ. Res.* **85**:403–414.
- S6. Arnoult, D., et al. 2002. Mitochondrial release of apoptosis-inducing factor occurs downstream of cytochrome c release in response to several proapoptotic stimuli. *J. Cell Biol.* **159**:923–929.
- S7. Arnoult, D., et al. 2003. Mitochondrial release of AIF and EndoG requires caspase activation downstream of Bax/Bak-mediated permeabilization. *EMBO J.* **22**:4385–4399.
- S8. Cilenti, L., et al. 2003. Characterization of a novel and specific inhibitor for the pro-apoptotic protease Omi/HtrA2. *J. Biol. Chem.* **278**:11489–11494.
- S9. Liu, H.R., et al. 2005. Role of Omi/HtrA2 in apoptotic cell death after myocardial ischemia and reperfusion. *Circulation.* **111**:90–96.
- S10. Wei, M.C., et al. 2001. Proapoptotic BAX and BAK: a requisite gateway to mitochondrial dysfunction and death. *Science.* **292**:727–730.
- S11. Cheng, E.H., et al. 2001. BCL-2, BCL-X(L) sequester BH3 domain-only molecules preventing BAX- and BAK-mediated mitochondrial apoptosis. *Mol. Cell.* **8**:705–711.
- S12. Neuss, M., et al. 2001. The apoptotic regulatory protein ARC (apoptosis repressor with caspase recruitment domain) prevents oxidant stress-mediated cell death by preserving mitochondrial function. *J. Biol. Chem.* **276**:33915–33922.
